# Supplementary material
Source: PubMed Central journal article supplement (PMC7578059)
Supplement: NIHMS1627425-supplement-008740_-_Supplemental_Material.pdf [file NIHMS1627425-supplement-008740_-_Supplemental_Material.pdf]

SUPPLEMENTAL MATERIAL

Supplemental Figures and Figure Legends

Supplement Figure S1

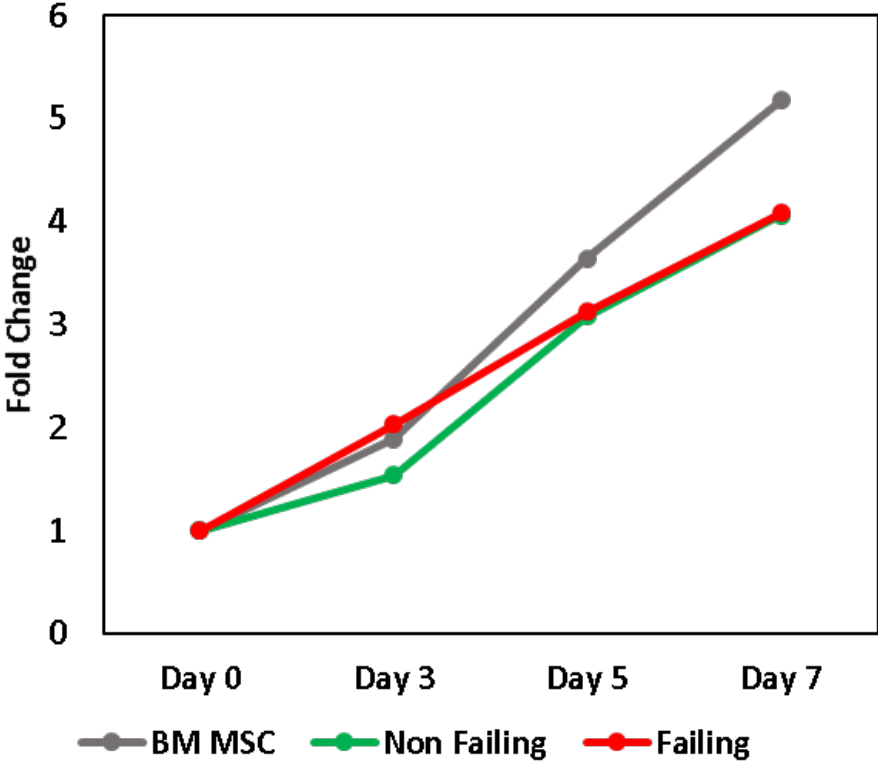

Figure S1: Growth curves for BM (bone marrow), non-failing and failing hMSCs.

## Supplement Figure S2

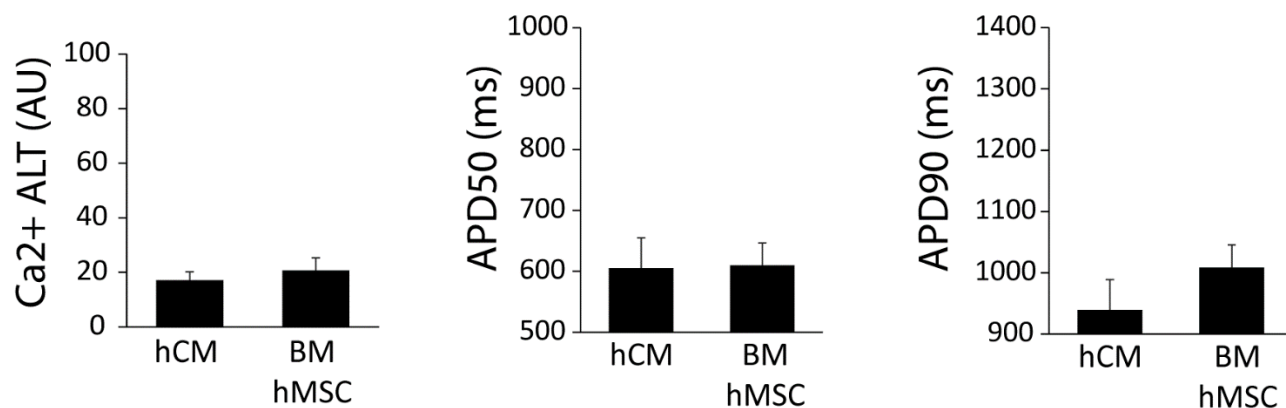

**Figure S2:** Ca<sup>2+</sup> alternans (ALT), APD50 and APD90 are shown for hCM alone and hCM + hMSCs isolated from bone marrow (BM hMSC). APD50 and APD90 were measured at a pacing cycle length of 1200 ms. No significant differences were observed between groups.

### Supplement Figure S3

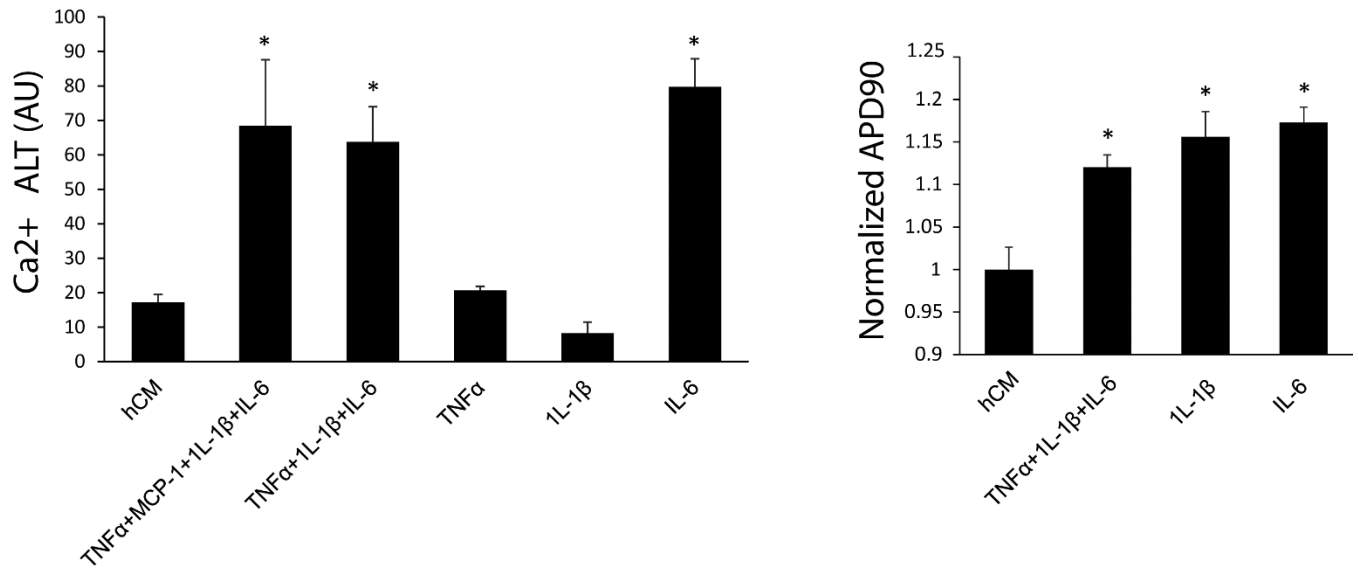

**Figure S3:** Preliminary studies evaluating the effects of combined and individual cytokines on Ca<sup>2+</sup> alternans and APD90. APD90 is shown normalized to control (hCM). Only IL-1 $\beta$  and IL-6 alone had a significant effect on Ca<sup>2+</sup> alternans and APD compared to control (hCM). Levels of significance are compared to hCM and are corrected for multiple comparisons. \* $p < 0.003$ .
